# Supplementary material for: Screening for rheumatoid arthritis-associated interstitial lung disease—a Delphi-based consensus statement
Source: Springer Nature journal article supplement (doi:10.1007/s00393-023-01464-w), 2024-01-19
Supplement: MOESM1 [file 26642464]

**Supplemental online material to:**

**Screening for Rheumatoid Arthritis-Interstitial Lung Disease – a Delphi-based Consensus Statement**

K. Hackner, L. Hütter, H. Flick et al.; Zeitschrift für Rheumatologie

Overview of the questions provided to the expert panel and the individual group outcome

| Voting round | Cluster | Question                                                                                                                                                                              | Responses<br>n (% of panel) | Level<br>of<br>agreement* | Consent*<br>Median (IQR) |
|--------------|---------|---------------------------------------------------------------------------------------------------------------------------------------------------------------------------------------|-----------------------------|---------------------------|--------------------------|
| Round 1      | I       | A clinically significant RA-ILD is present in 8-15% of RA patients and is an important cause of mortality and quality of life.                                                        | 11 (92)                     | 100%                      | 4 (4-4)                  |
|              |         | Preclinical RA-ILDs poses an important factor in the therapeutic decision in RA.                                                                                                      | 11 (92)                     | 100%                      | 4 (4-4)                  |
|              |         | Patients with RA should be asked for respiratory symptoms (e. g. persistent cough, dyspnea on exertion) regularly.                                                                    | 11 (92)                     | 100%                      | 4 (3-4)                  |
|              |         | Patients with RA should undergo regular auscultation.                                                                                                                                 | 11 (92)                     | 91%                       | 3 (3-4)                  |
|              |         | Patients with RA should be informed about a possible lung involvement of the rheumatic disease.                                                                                       | 11 (92)                     | 91%                       | 4 (3-4)                  |
|              |         | Additional question: A questionnaire should be used to screen for respiratory symptoms in patients with RA.                                                                           | 7 (59)                      | 57%                       | 3 (2-3)                  |
|              | II      | Patients with RA and respiratory symptoms (e. g. persistent cough, dyspnea on exertion) should undergo pulmonary function testing and DLCO testing prior to radiological examination. | 11 (92)                     | 73%                       | 4 (3-4)                  |
|              |         | The primary radiological examination in patients with RA and respiratory symptoms (e.g. persistent cough, dyspnea on exertion) should be a non-contrast HR-CT.                        | 12 (100)                    | 100%                      | 4 (4-4)                  |
|              | III     | Risk factors for RA-ILD are: h/o or current smoking, CCP-antibodies, RF, male sex, increased disease activity (CDAI >10), family history of RA-ILD.                                   | 12 (100)                    | 100%                      | 4 (4-4)                  |
|              |         | RA patients without respiratory symptoms suggesting RA-ILD should receive further diagnostic examinations for possible RA-ILD if one known risk factor for RA-ILD is present.         | 12 (100)                    | 58%                       | 3 (2-3)                  |
|              |         | RA patients without respiratory symptoms suggesting RA-ILD should receive further diagnostic examinations for possible RA-ILD when ≥ 2 known risk factors for RA-ILD are present.     | 11 (92)                     | 91%                       | 3 (3-4)                  |
|              |         | RA patients without respiratory symptoms suggesting RA-ILD should receive further diagnostic examinations for possible RA-ILD when a history of or current smoking status is present. | 12 (100)                    | 83%                       | 3 (3-4)                  |
|              |         | In case of no identified risk factors for RA-ILD in RA patients without respiratory symptoms, age ≥ 50 years should lead to further diagnostic examinations for possible RA-ILD       | 10 (83)                     | 20%                       | 1.5<br>(1-2.25)          |

|     |         |                                                                                                                                                                                                                                                                                    |                                                                                                                                                                                        |          |           |         |
|-----|---------|------------------------------------------------------------------------------------------------------------------------------------------------------------------------------------------------------------------------------------------------------------------------------------|----------------------------------------------------------------------------------------------------------------------------------------------------------------------------------------|----------|-----------|---------|
|     | IV      | RA patients without respiratory symptoms of RA-ILD, but with risk factor(s) for RA-ILD should receive HR-CT as the primary radiological examination for RA-ILD.                                                                                                                    | 10 (83)                                                                                                                                                                                | 70%      | 3.5 (2-4) |         |
|     |         | RA patients without respiratory symptoms of RA-ILD, but with risk factor(s) for RA-ILD should receive pulmonary function testing, including DLCO, and chest radiography to exclude RA-ILD.                                                                                         | 11 (92)                                                                                                                                                                                | 63%      | 3 (2-3)   |         |
|     |         | In RA patients without respiratory symptoms of RA-ILD, but with risk factor(s) for RA-ILD, normal pulmonary function tests, including DLCO, and normal chest radiography enable to exclude RA-ILD at that time.                                                                    | 11 (92)                                                                                                                                                                                | 36%      | 2 (2-3)   |         |
|     |         | In RA patients without respiratory symptoms of RA-ILD, but with risk factor(s) for RA-ILD, a normal transthoracic ultrasound, performed by an experienced examiner, enables exclusion of RA-ILD at that time.                                                                      | 9 (75)                                                                                                                                                                                 | 66%      | 3 (2-3)   |         |
|     | V       | In RA patients without respiratory symptoms of RA-ILD, but with risk factor(s) for RA-ILD, and without evidence for RA-ILD in the further diagnostic examination(s), follow-up should be performed with regular HR-CT.                                                             | 10 (83)                                                                                                                                                                                | 0%       | 1 (1-2)   |         |
|     |         | In RA patients without respiratory symptoms of RA-ILD, but with risk factor(s) for RA-ILD, and without evidence for RA-ILD in the further diagnostic examination(s), follow-up should be performed with regular pulmonary function testing, including DLCO, and chest radiography. | 12 (100)                                                                                                                                                                               | 66%      | 3 (2-3)   |         |
|     |         | In RA patients without respiratory symptoms of RA-ILD, but with risk factor(s) for RA-ILD, and without evidence for RA-ILD in the further diagnostic examination(s), follow-up should be performed with regular transthoracic ultrasound, performed by an experienced examiner.    | 10 (83)                                                                                                                                                                                | 100%     | 3 (3-4)   |         |
|     | Round 2 | I                                                                                                                                                                                                                                                                                  | In patients with RA, monitoring of clinical signs (e.g. by auscultation) of a possible RA-ILD at the time of diagnosis and during the regular RA follow-up visits should be performed. | 11 (92)  | 100%      | 4 (4-4) |
|     |         |                                                                                                                                                                                                                                                                                    | An HR-CT suggesting RA-ILD should lead to a multidisciplinary discussion of the patient's further management.                                                                          | 12 (100) | 100%      | 4 (4-4) |
| III |         | Known risk factors for RA-ILD (h/o or current smoking, CCP-antibodies, RF, male sex, increased disease activity (CDAI >10), family history of RA-ILD, age ≥55 years) pose a major role for the decision to screen RA patients without respiratory symptoms for RA-ILD.             | 12 (100)                                                                                                                                                                               | 100%     | 4 (4-4)   |         |
|     |         | Additional question: The number of present risk factors is important for this decision.                                                                                                                                                                                            | 8 (67)                                                                                                                                                                                 | 75%      | 3 (1-4)   |         |
|     |         | In RA patients without respiratory symptoms but with risk factor(s) for RA-ILD, who were selected to be screened for RA-ILD, HR-CT and pulmonary function testing including DLCO, should be performed.                                                                             | 12 (100)                                                                                                                                                                               | 100%     | 4 (3-4)   |         |
| V   |         | Follow-up examinations for RA-ILD screening should include pulmonary function testing including DLCO.                                                                                                                                                                              | 11 (92)                                                                                                                                                                                | 82%      | 4 (3-4)   |         |
|     |         | Follow-up examinations for RA-ILD screening should include HR-CT at least after 5 years, even in case of normal pulmonary function testings and DLCO.                                                                                                                              | 11 (92)                                                                                                                                                                                | 63%      | 3 (1-4)   |         |
|     |         | Follow-up examinations for RA-ILD screening should include pulmonary function testing including DLCO and optional may include transthoracic ultrasound by an experienced examiner.                                                                                                 | 12 (100)                                                                                                                                                                               | 100%     | 4 (4-4)   |         |

|         |     |                                                                                                                                                                                                                                                                                                                                                                                                                                                                                                      |          |      |         |
|---------|-----|------------------------------------------------------------------------------------------------------------------------------------------------------------------------------------------------------------------------------------------------------------------------------------------------------------------------------------------------------------------------------------------------------------------------------------------------------------------------------------------------------|----------|------|---------|
| Round 3 | III | Currently, there is not enough evidence on the required quantity and the intrinsic value of known RA-ILD risk factors (including age), to provide an objective statement on the initiation of RA-ILD screening. Therefore, until further evidence is provided, RA patients without respiratory symptoms but with known risk factor(s) for RA-ILD should be included into RA-ILD screening at the discretion of the treating physician on a case-by-case decision.                                    | 12 (100) | 100% | 4 (4-4) |
|         | V   | Currently, there is not enough evidence on the use and intervals of HR-CT for regular RA-ILD screening to provide an objective statement. Therefore, until further evidence is provided, the decision to perform regular HR-CT (additionally to clinical follow up, pulmonary function testing, DLCO, and optional pleurasonography) in RA patients without respiratory symptoms but with known risk factor(s) for RA-ILD is at the discretion of the treating physician on a case-by-case decision. | 12 (100) | 100% | 4 (4-4) |

\* The definition of consensus was predetermined and set to a level of agreement  $\geq 70\%$  AND consent with a median value of  $\geq 3$  on the 4-point scale (fully agree=4, partly agree=3, partly disagree=2, fully disagree=1; abstention) with a lower interquartile range  $\geq 3$ .
